# Supplementary figures and images for: Ancient DNA from the Asiatic Wild Dog (Cuon alpinus) from Europe
Source: MDPI journal article supplement (doi:10.3390/genes12020144), 2021-01-22

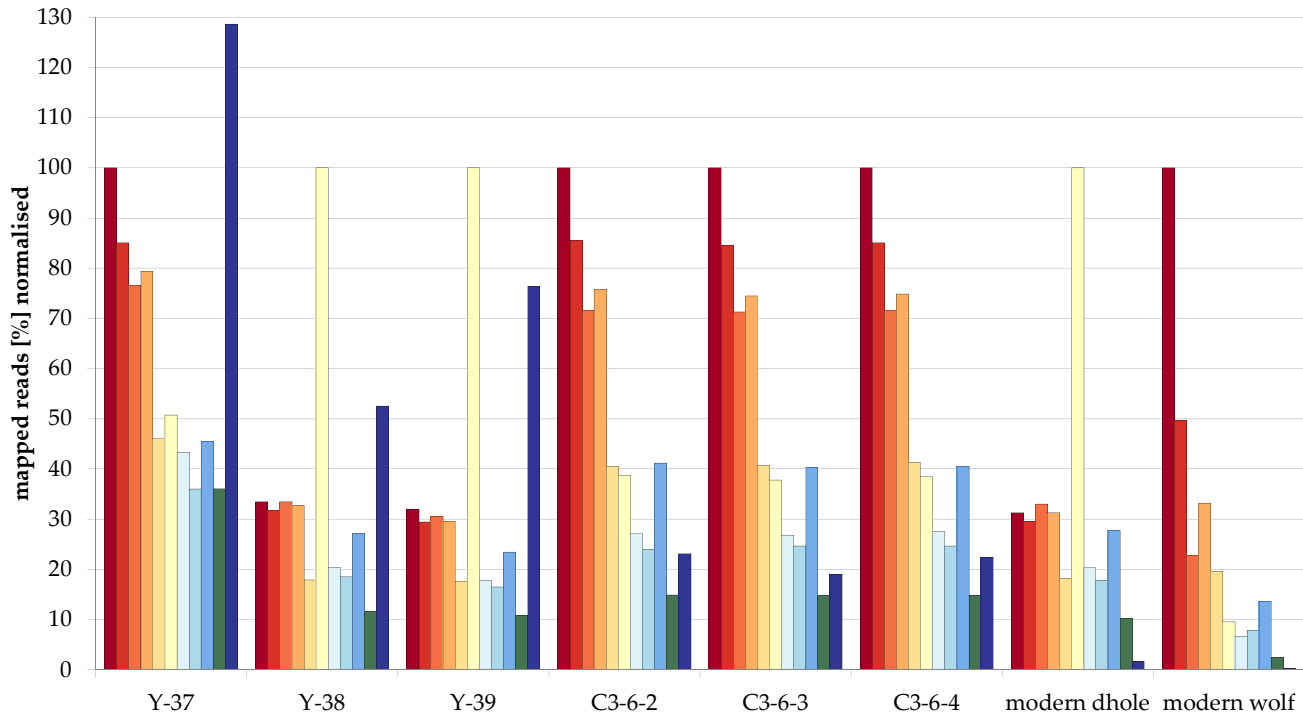

Supplement: s1 [file s1]

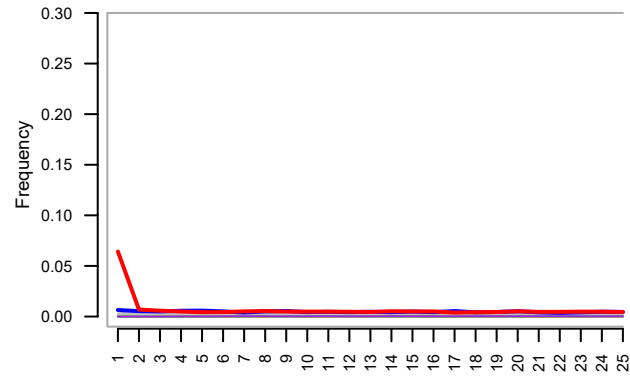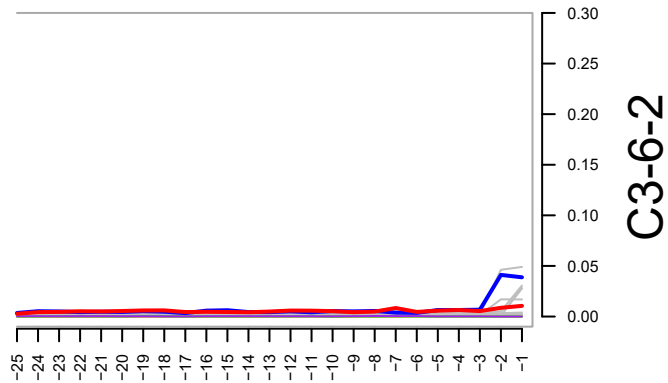

C3-6-2

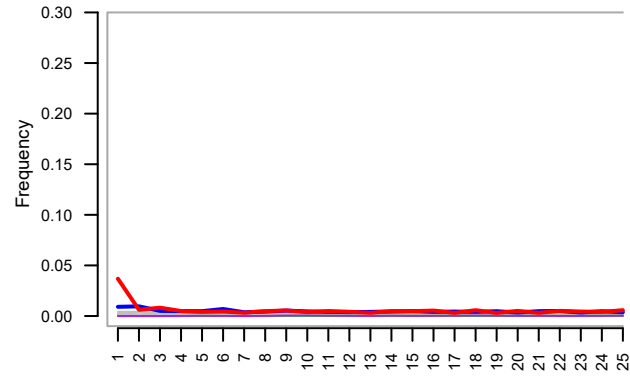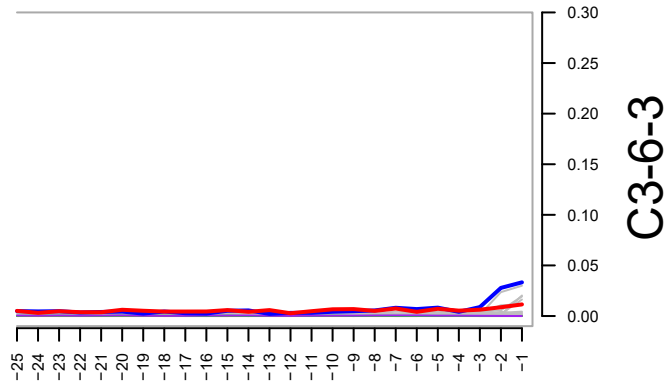

C3-6-3

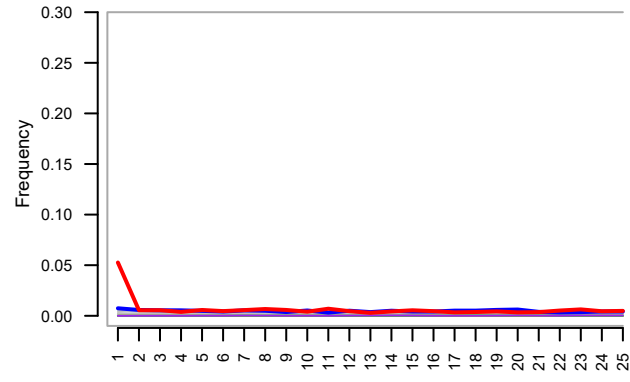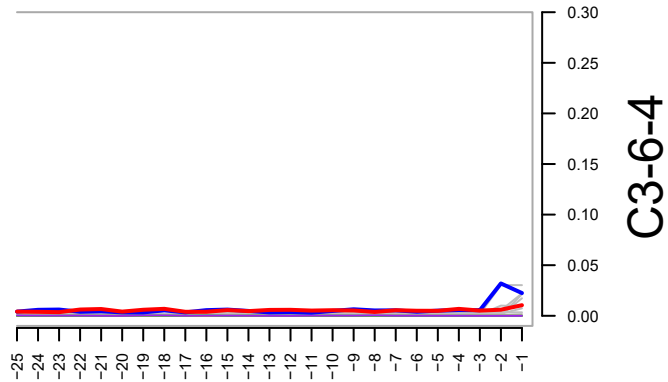

C3-6-4

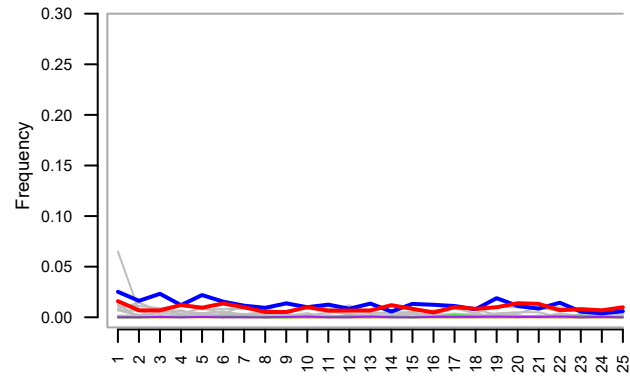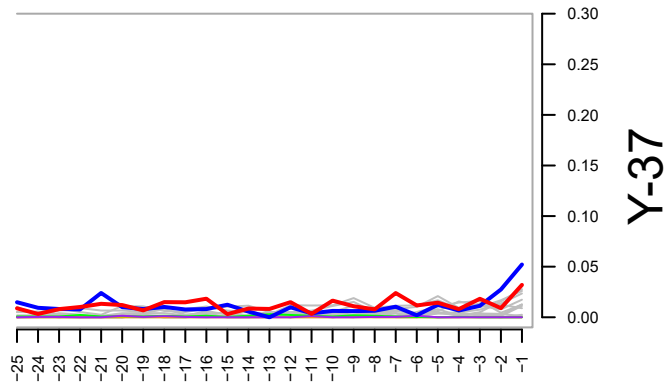

Y-37

Supplement: s1 [file s1]

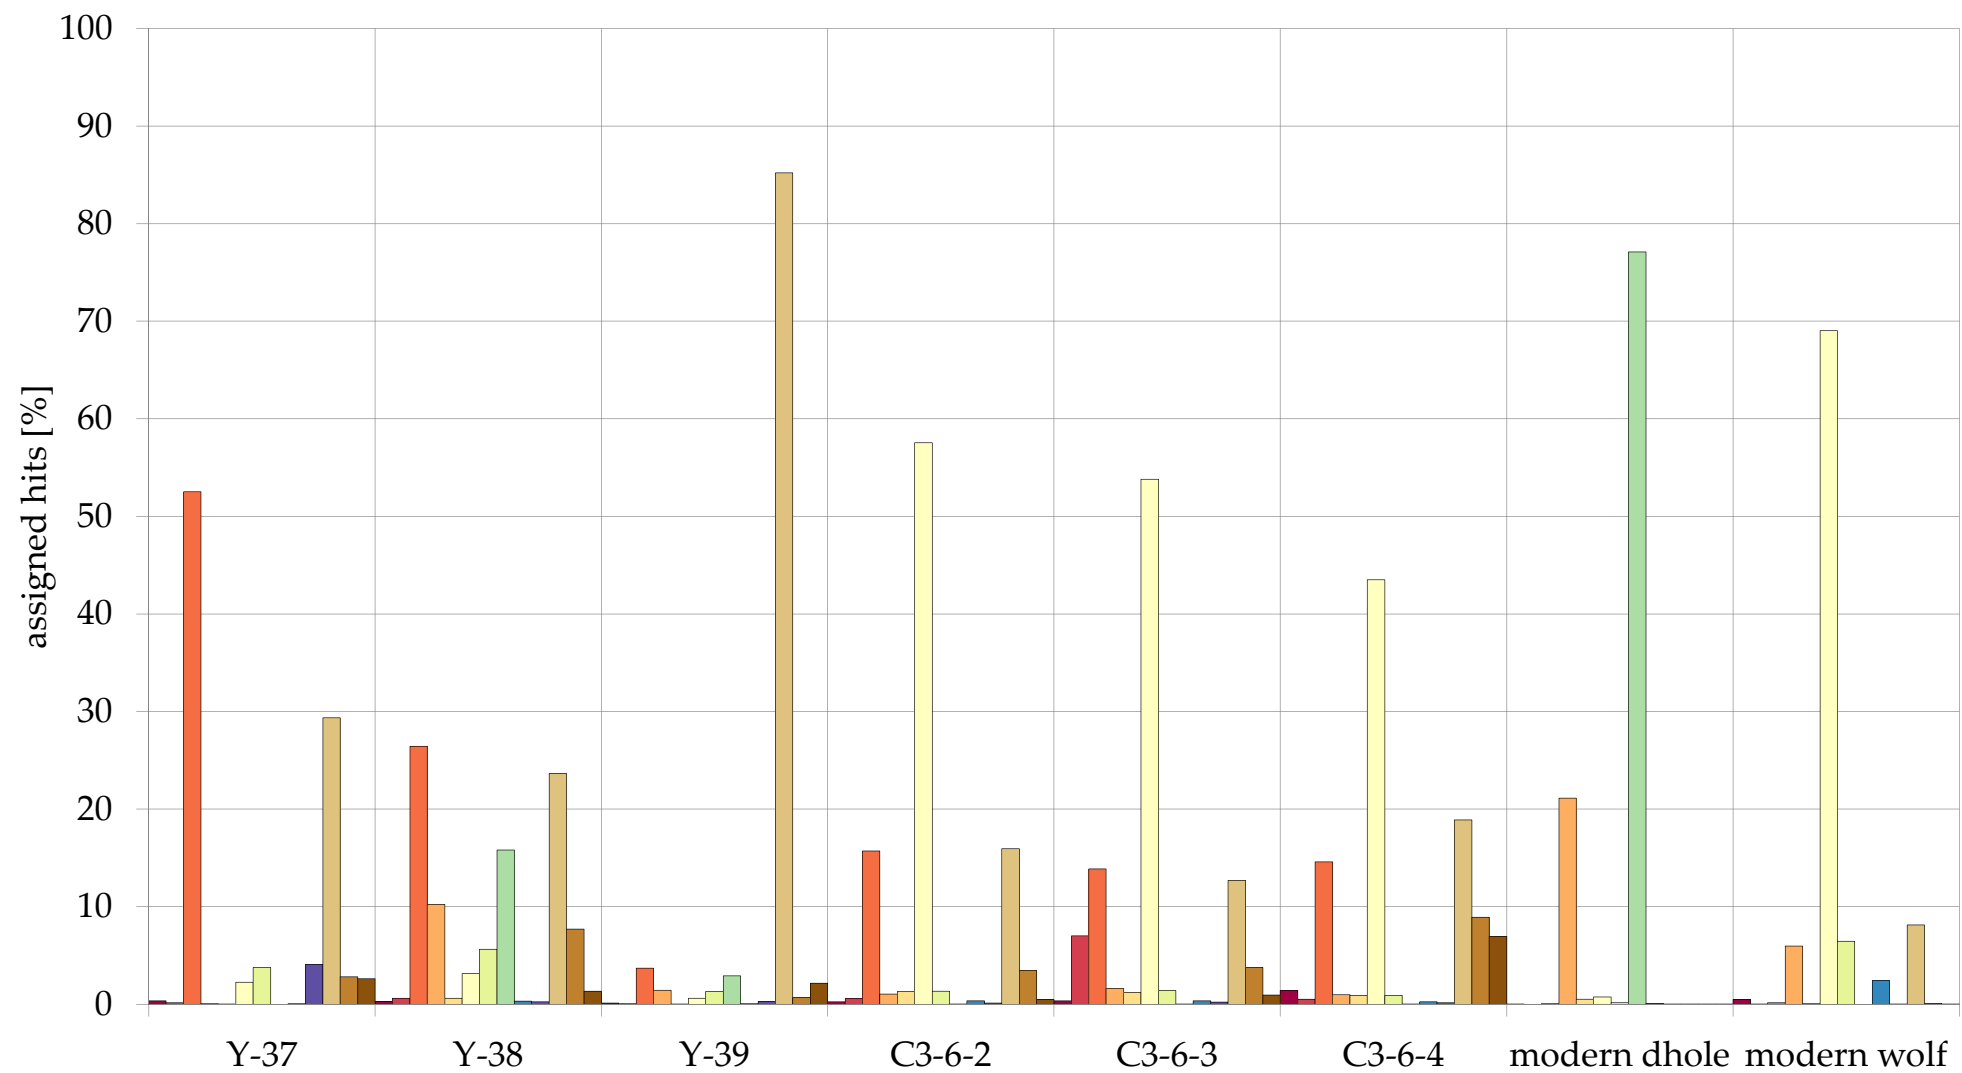

Supplement: s1 [file s1]

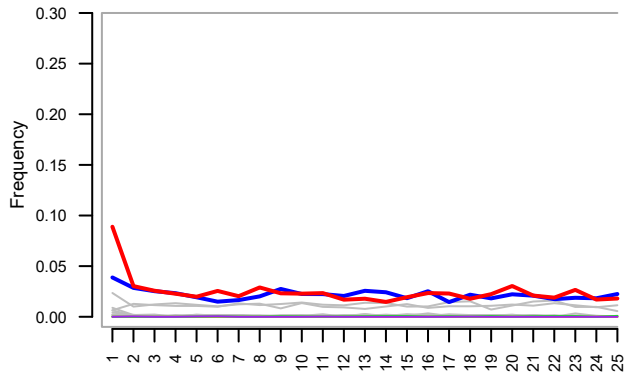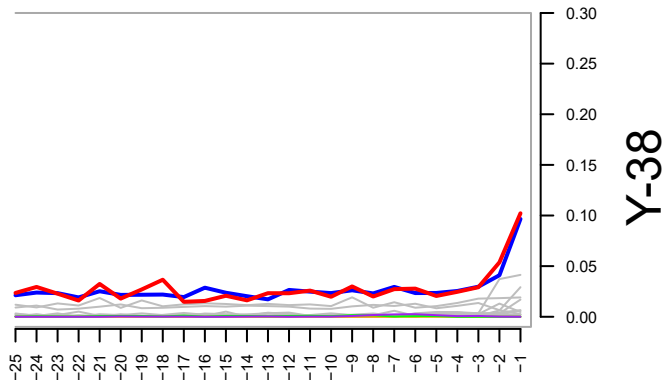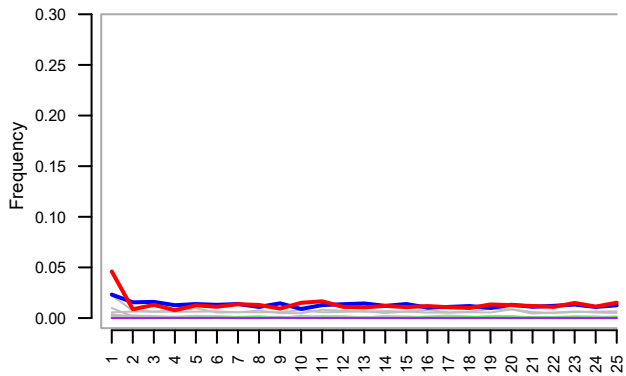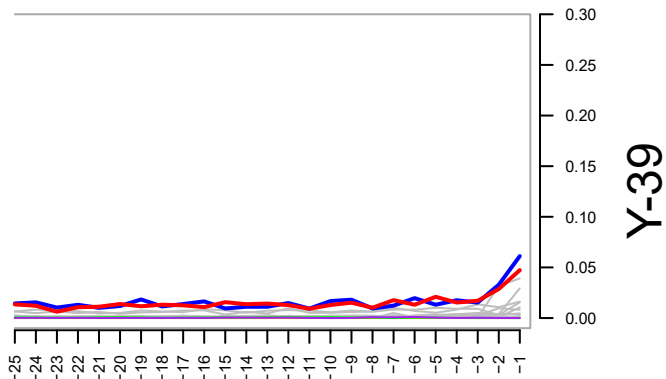

Supplement: s1 [file s1]

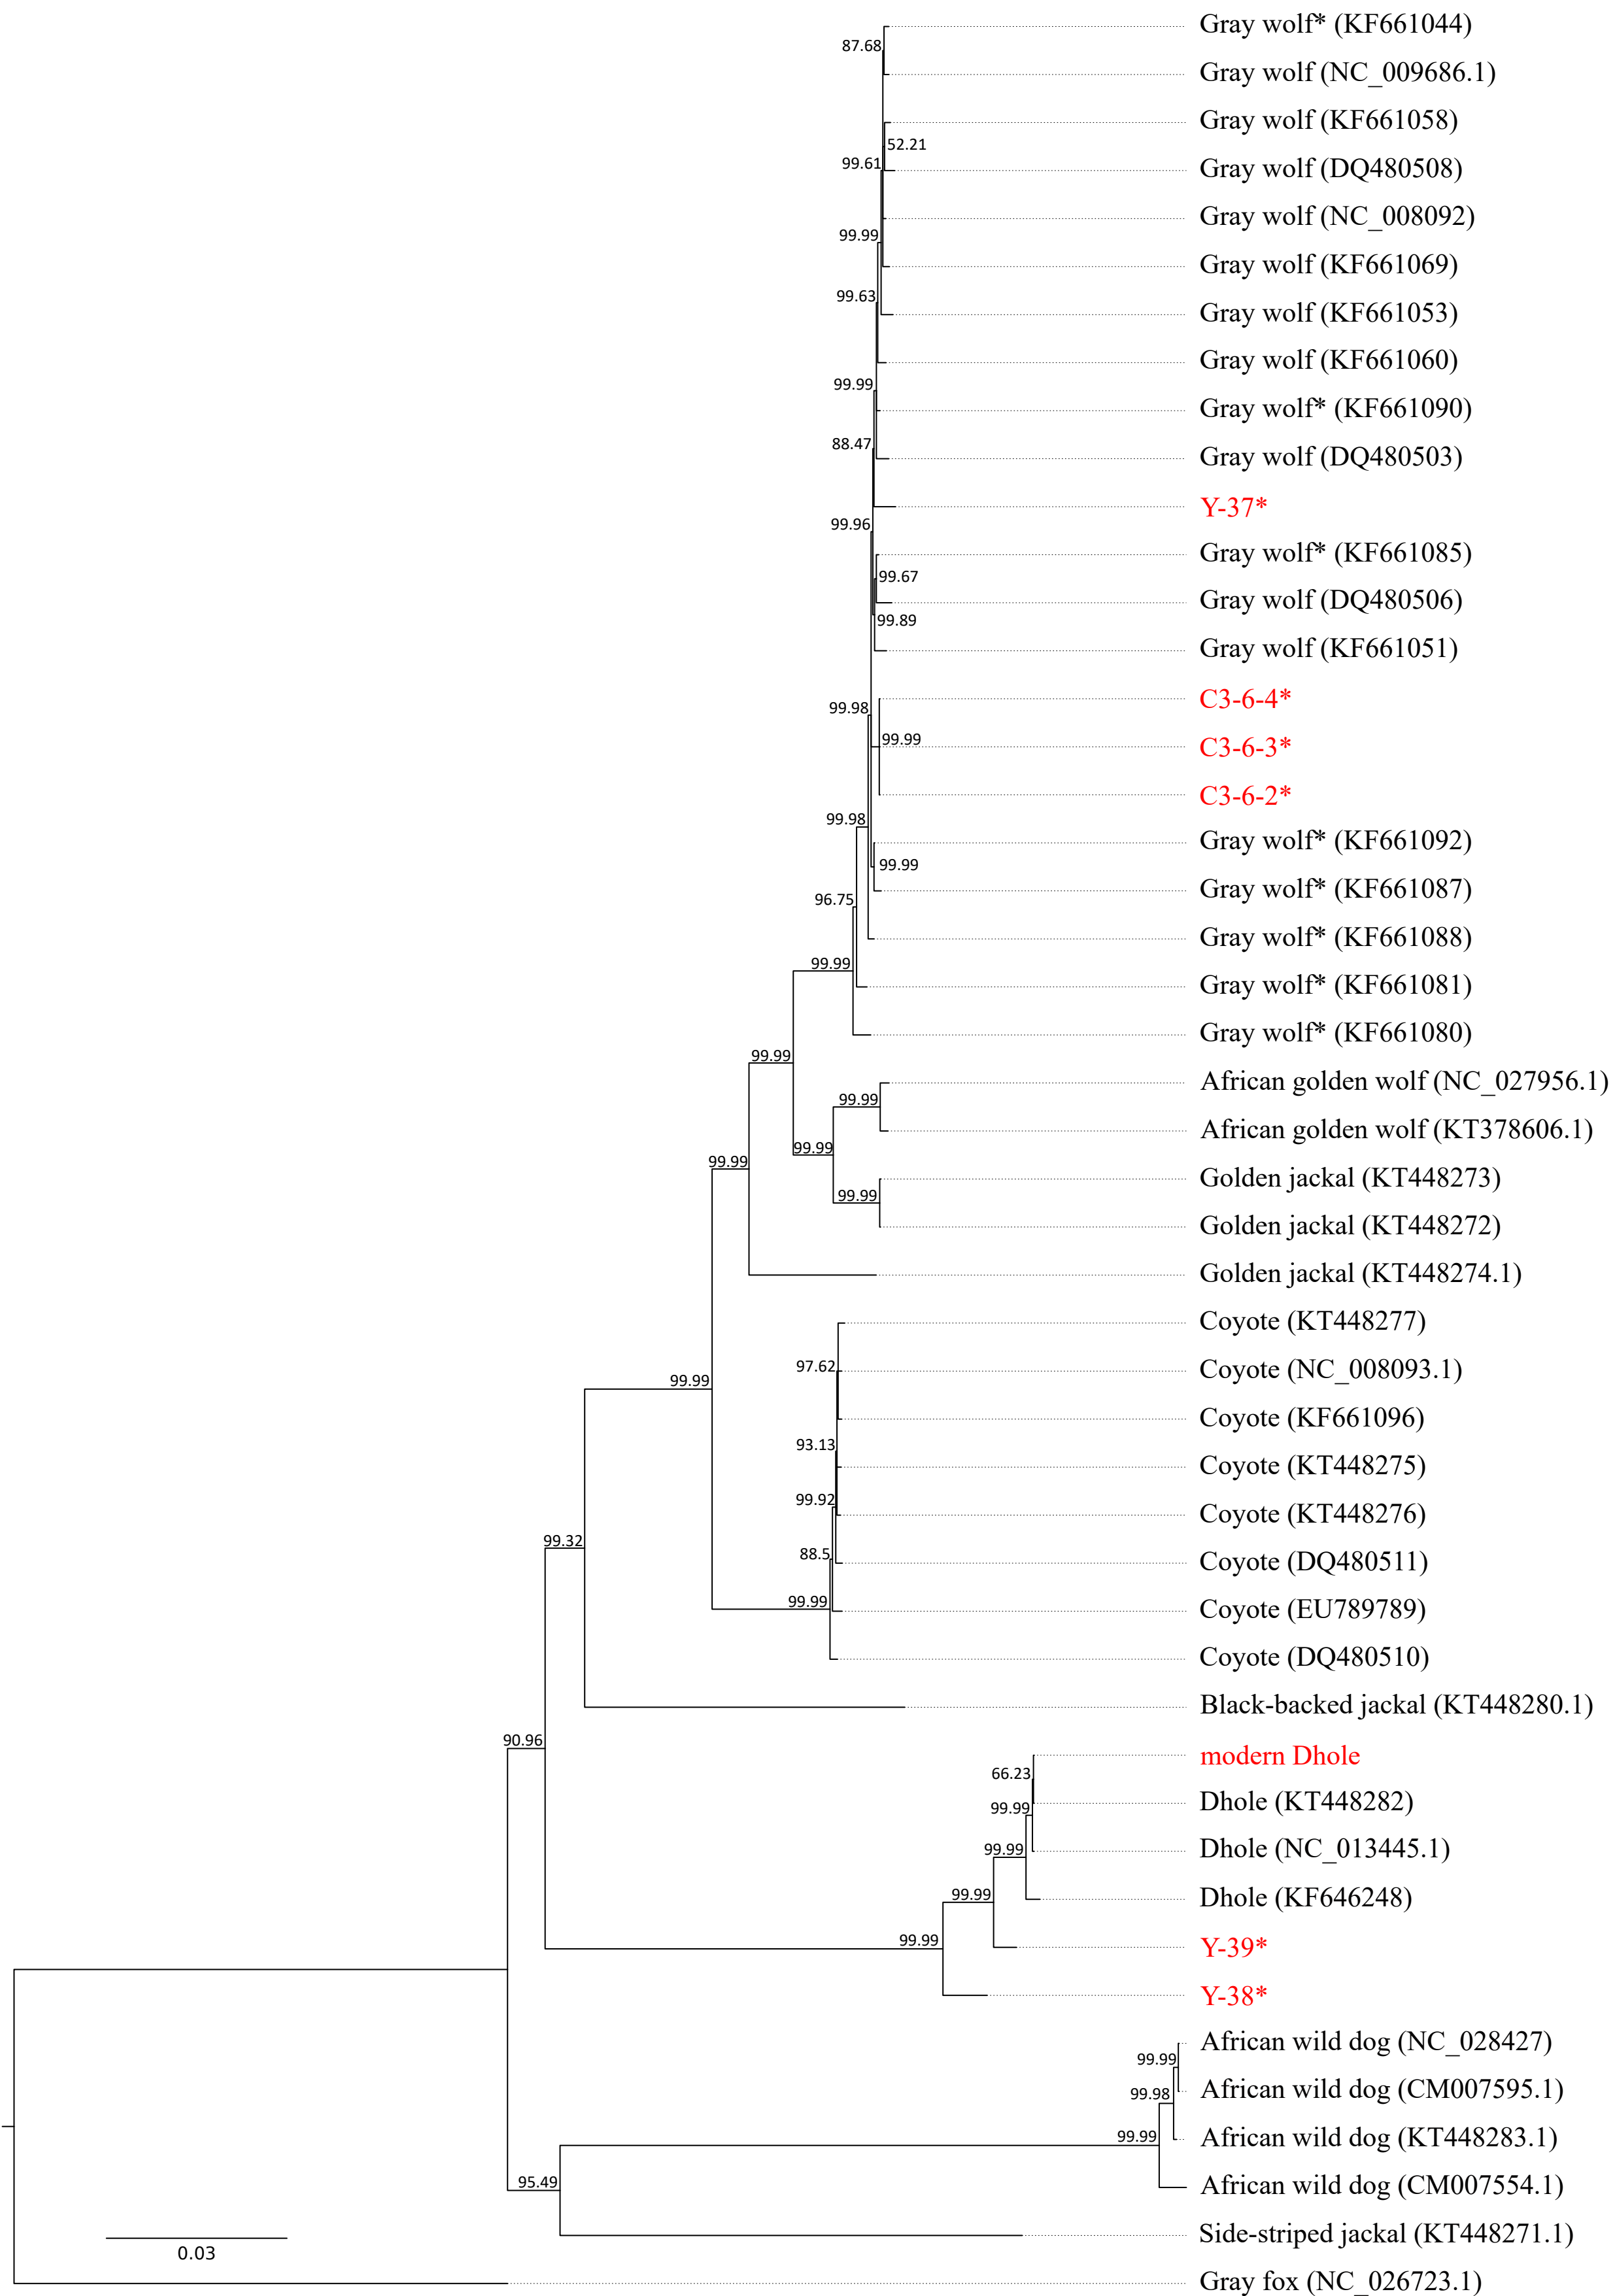

Supplement: s1 [file s1]
